# Supplementary material for: Structure and Evolution of Glycogen Branching Enzyme N-Termini From Bacteria
Source: Front Microbiol. 2019 Jan 14;9:3354. doi: 10.3389/fmicb.2018.03354 (PMC6339891; doi:10.3389/fmicb.2018.03354)
Supplement: Supplementary file 1 [file Table_1.XLSX]

## Sheet: Sheet1
Supplementary Table S1 169 Bacterial GBEs with domain boundaries. All GBEs listed belong to GH13_9 according to CAZy classification system except for four proteins with no entry in the database. Bacteria are ranked in ascending order in terms of the extended length ahead of N-terminal domain CBM48. In the 169 bacterial species, 8 strains have duplicated GBEs, which are marked with orange color in…
Bacteria	UniProt_ID	NCBI Taxonomy Identifier	Cazy Classification	Color	Phylum	Protein_Name	Length	Group	N1/N2 Homology (HMM E-value<0.05)	HMM E-value	Domain_CBM48	Start1	End1	Domain_Alpha_Amylase	Start2	End2	Domain__C-terminus	Start3	End3
Fusobacterium nucleatum	Q8RF62	190304	GH13_9	Blue	Fusobacteria	GLGB_FUSNN	611	Type 2	NO	n/a	PF02922_CBM48	6	115	PF00128_Alpha_Amylase	153	504	PF02806_Alpha_Amylase_C	505	609
Oceanobacillus iheyensis	Q8CZE8	221109	GH13_9	Grey	Firmicutes	GLGB_OCEIH	637	Type 2	NO	n/a	PF02922_CBM48	6	119	PF00128_Alpha_Amylase	116	525	PF02806_Alpha_Amylase_C	526	631
Rhodoferax ferrireducens	Q21WG7	338969	GH13_9	Yellow	b-Proteobacteria	GLGB_RHOFT	625	Type 2	NO	n/a	PF02922_CBM48	8	124	PF00128_Alpha_Amylase	156	492	PF02806_Alpha_Amylase_C	520	620
Lactobacillus acidophilus	Q5FL68	272621	GH13_9	Grey	Firmicutes	GLGB_LACAC	638	Type 2	NO	n/a	PF02922_CBM48	9	113	PF00128_Alpha_Amylase	156	608	PF02806_Alpha_Amylase_C	516	631
Streptomyces avermitilis GlgB2	Q825Q8	227882	GH13_9	Pink	Actinobacteria	GLGB2_STRAW	592	Type 2	NO	n/a	PF02922_CBM48	9	118	PF00128_Alpha_Amylase	126	474	PF02806_Alpha_Amylase_C	496	590
Bacillus anthracis	Q81K82	1392	GH13_9	Grey	Firmicutes	GLGB_BACAN	645	Type 2	NO	n/a	PF02922_CBM48	10	143	PF00128_Alpha_Amylase	136	598	PF02806_Alpha_Amylase_C	513	635
Bacillus cereus	C1EX54	572264	GH13_9	Grey	Firmicutes	GLGB_BACC3	645	Type 2	NO	n/a	PF02922_CBM48	10	143	PF00128_Alpha_Amylase	136	587	PF02806_Alpha_Amylase_C	513	635
Bacillus thuringiensis	Q6HC15	281309	GH13_9	Grey	Firmicutes	GLGB_BACHK	645	Type 2	NO	n/a	PF02922_CBM48	10	143	PF00128_Alpha_Amylase	136	587	PF02806_Alpha_Amylase_C	513	635
Dechloromonas aromatica	Q47II8	159087	GH13_9	Yellow	b-Proteobacteria	GLGB_DECAR	621	Type 2	NO	n/a	PF02922_CBM48	10	103	PF00128_Alpha_Amylase	150	492	PF02806_Alpha_Amylase_C	518	619
Streptococcus pneumoniae	Q8DPS6	171101	GH13_9	Grey	Firmicutes	GLGB_STRR6	642	Type 2	NO	n/a	PF02922_CBM48	10	121	PF00128_Alpha_Amylase	154	495	PF02806_Alpha_Amylase_C	523	627
Bacillus weihenstephanensis	A9VMV8	315730	GH13_9	Grey	Firmicutes	GLGB_BACWK	645	Type 2	NO	n/a	PF02922_CBM48	11	128	PF00128_Alpha_Amylase	134	529	PF02806_Alpha_Amylase_C	516	635
Butyrivibrio fibrisolvens	P30539	831	GH13_9	Grey	Firmicutes	GLGB_BUTFI	639	Type 2	NO	n/a	PF02922_CBM48	11	142	PF00128_Alpha_Amylase	166	545	PF02806_Alpha_Amylase_C	529	636
Halothermothrix orenii	B8CVY1	373903	GH13_9	Grey	Firmicutes	GLGB_HALOH	630	Type 2	NO	n/a	PF02922_CBM48	11	151	PF00128_Alpha_Amylase	163	533	PF02806_Alpha_Amylase_C	504	626
Lactobacillus plantarum	Q890J1	220668	GH13_9	Grey	Firmicutes	GLGB_LACPL	634	Type 2	NO	n/a	PF02922_CBM48	11	115	PF00128_Alpha_Amylase	156	538	PF02806_Alpha_Amylase_C	500	624
Streptococcus gordonii	A8AYH3	467705	GH13_9	Grey	Firmicutes	GLGB_STRGC	633	Type 2	NO	n/a	PF02922_CBM48	11	109	PF00128_Alpha_Amylase	153	507	PF02806_Alpha_Amylase_C	499	630
Streptococcus sanguinis	A3CM01	388919	GH13_9	Grey	Firmicutes	GLGB_STRSV	636	Type 2	NO	n/a	PF02922_CBM48	11	110	PF00128_Alpha_Amylase	153	502	PF02806_Alpha_Amylase_C	499	628
Bacillus subtilis	P39118	224308	GH13_9	Grey	Firmicutes	GLGB_BACSU	627	Type 2	NO	n/a	PF02922_CBM48	12	141	PF00128_Alpha_Amylase	155	524	PF02806_Alpha_Amylase_C	514	621
Salinibacter ruber	Q2S4A0	309807	GH13_9	Purple	Bacteroidetes	GLGB_SALRD	622	Type 2	NO	n/a	PF02922_CBM48	12	120	PF00128_Alpha_Amylase	166	528	PF02806_Alpha_Amylase_C	519	619
Bacillus licheniformis	Q65FS4	279010	GH13_9	Grey	Firmicutes	GLGB_BACLD	627	Type 2	NO	n/a	PF02922_CBM48	13	141	PF00128_Alpha_Amylase	126	520	PF02806_Alpha_Amylase_C	514	622
Geobacillus stearothermophilus	P30538	1422	GH13_9	Grey	Firmicutes	GLGB_GEOSE	639	Type 2	NO	n/a	PF02922_CBM48	13	128	PF00128_Alpha_Amylase	158	495	PF02806_Alpha_Amylase_C	517	624
Streptococcus agalactiae	Q3K1K5	205921	GH13_9	Grey	Firmicutes	GLGB_STRA1	622	Type 2	NO	n/a	PF02922_CBM48	13	110	PF00128_Alpha_Amylase	141	505	PF02806_Alpha_Amylase_C	518	617
Bacillus caldolyticus	P30537	1394	GH13_9	Grey	Firmicutes	GLGB_BACCL	666	Type 2	NO	n/a	PF02922_CBM48	14	140	PF00128_Alpha_Amylase	132	499	PF02806_Alpha_Amylase_C	517	632
Bacillus cytotoxicus	A7GUA1	315749	GH13_9	Grey	Firmicutes	GLGB_BACCN	645	Type 2	NO	n/a	PF02922_CBM48	14	121	PF00128_Alpha_Amylase	159	527	PF02806_Alpha_Amylase_C	515	630
Aquifex aeolicus	O66936	224324	GH13_9	Red	Aquificae	GLGB_AQUAE	630	Type 2	NO	n/a	PF02922_CBM48	15	141	PF00128_Alpha_Amylase	168	525	PF02806_Alpha_Amylase_C	507	627
Aromatoleum aromaticum	Q5NXV7	76114	GH13_9	Yellow	b-Proteobacteria	GLGB_AROAE	636	Type 2	NO	n/a	PF02922_CBM48	15	139	PF00128_Alpha_Amylase	168	538	PF02806_Alpha_Amylase_C	526	626
Lactobacillus salivarius	Q1WSM8	362948	GH13_9	Grey	Firmicutes	GLGB_LACS1	649	Type 2	NO	n/a	PF02922_CBM48	15	131	PF00128_Alpha_Amylase	145	531	PF02806_Alpha_Amylase_C	532	646
Streptococcus mutans	Q8DT52	210007	GH13_9	Grey	Firmicutes	GLGB_STRMU	628	Type 2	NO	n/a	PF02922_CBM48	16	110	PF00128_Alpha_Amylase	159	528	PF02806_Alpha_Amylase_C	525	623
Rhodothermus marinus	Q93HU3	29549	GH13_9	Purple	Bacteroidetes	GLGB_RHOMR	621	Type 2	NO	n/a	PF02922_CBM48	18	130	PF00128_Alpha_Amylase	164	504	PF02806_Alpha_Amylase_C	519	619
Deinococcus radiodurans	Q9RTB7	243230	GH13_9	Green	Deinococcus-Thermus	GLGB_DEIRA	705	Type 2	NO	n/a	PF02922_CBM48	19	121	PF00128_Alpha_Amylase	165	525	PF02806_Alpha_Amylase_C	522	631
Marinobacter hydrocarbonoclasticus	A1U0K1	351348	GH13_9	Yellow	g-Proteobacteria	GLGB_MARHV	631	Type 2	NO	n/a	PF02922_CBM48	22	118	PF00128_Alpha_Amylase	152	507	PF02806_Alpha_Amylase_C	512	628
Desulfovibrio vulgaris	Q729V5	882	GH13_9	Yellow	d-Proteobacteria	GLGB_DESVH	640	Type 2	NO	n/a	PF02922_CBM48	24	128	PF00128_Alpha_Amylase	167	539	PF02806_Alpha_Amylase_C	531	635
Francisella philomiragia	B0TZI5	484022	GH13_9	Yellow	g-Proteobacteria	GLGB_FRAP2	640	Type 2	NO	n/a	PF02922_CBM48	25	152	PF00128_Alpha_Amylase	129	557	PF02806_Alpha_Amylase_C	494	639
Desulfitobacterium hafniense	Q24VW3	138119	GH13_9	Grey	Firmicutes	GLGB_DESHY	632	Type 2	NO	n/a	PF02922_CBM48	27	125	PF00128_Alpha_Amylase	114	535	PF02806_Alpha_Amylase_C	526	628
Francisella tularensis	A7NAI2	458234	GH13_9	Yellow	g-Proteobacteria	GLGB_FRATF	640	Type 2	NO	n/a	PF02922_CBM48	29	150	PF00128_Alpha_Amylase	129	548	PF02806_Alpha_Amylase_C	515	637
Propionibacterium acnes	Q6A8Q7	267747	GH13_9	Pink	Actinobacteria	GLGB_PROAC	644	Type 2	NO	n/a	PF02922_CBM48	29	149	PF00128_Alpha_Amylase	117	534	PF02806_Alpha_Amylase_C	527	632
Desulfovibrio alaskensis	Q30Z14	207559	GH13_9	Yellow	d-Proteobacteria	GLGB_DESAG	638	Type 2	NO	n/a	PF02922_CBM48	32	133	PF00128_Alpha_Amylase	166	538	PF02806_Alpha_Amylase_C	533	636
Deinococcus geothermalis	Q1IZQ3	319795	GH13_9	Green	Deinococcus-Thermus	GLGB_DEIGD	652	Type 2	NO	n/a	PF02922_CBM48	36	132	PF00128_Alpha_Amylase	177	510	PF02806_Alpha_Amylase_C	534	646
Clostridium perfringens GlgB1	Q8XPA2	195102	GH13_9	Grey	Firmicutes	GLGB1_CLOPE	674	Type 2	NO	n/a	PF02922_CBM48	39	150	PF00128_Alpha_Amylase	146	580	PF02806_Alpha_Amylase_C	535	666
Clostridium perfringens GlgB2	Q8XK15	195102	GH13_9	Grey	Firmicutes	GLGB2_CLOPE	664	Type 2	NO	n/a	PF02922_CBM48	48	156	PF00128_Alpha_Amylase	146	567	PF02806_Alpha_Amylase_C	558	662
Alkalilimnicola ehrlichii	Q0AA26	187272	GH13_9	Yellow	g-Proteobacteria	GLGB_ALKEH	695	Type 2	YES	0.002	PF02922_CBM48	76	178	PF00128_Alpha_Amylase	226	589	PF02806_Alpha_Amylase_C	583	690
Jannaschia sp.	Q28MN2	290400	GH13_9	Yellow	a-Proteobacteria	GLGB_JANSC	701	Type 2	NO	n/a	PF02922_CBM48	90	188	PF00128_Alpha_Amylase	240	567	PF02806_Alpha_Amylase_C	600	698
Vibrio vulnificus	Q8D4P0	216895	GH13_9	Yellow	g-Proteobacteria	GLGB_VIBVU	715	Type 1	YES	1.6e-07	PF02922_CBM48	105	226	PF00128_Alpha_Amylase	214	455	PF02806_Alpha_Amylase_C	594	713
Photobacterium profundum	Q6LHN1	298386	GH13_9	Yellow	g-Proteobacteria	GLGB_PHOPR	716	Type 1	YES	6.6e-08	PF02922_CBM48	107	221	PF00128_Alpha_Amylase	228	451	PF02806_Alpha_Amylase_C	614	714
Xanthomonas axonopodis GlgB2	Q8PQA2	190486	GH13_9	Yellow	g-Proteobacteria	GLGB2_XANAC	719	Type 1	YES	3.1e-07	PF02922_CBM48	107	210	PF00128_Alpha_Amylase	248	609	PF02806_Alpha_Amylase_C	591	718
Chlamydia felis	Q253M6	264202	GH13_9	Orange	Chlamydiae	GLGB_CHLFF	721	Type 1	YES	8.9e-06	PF02922_CBM48	108	209	PF00128_Alpha_Amylase	254	634	PF02806_Alpha_Amylase_C	616	715
Chlamydophila caviae	Q823Y5	227941	GH13_9	Orange	Chlamydiae	GLGB_CHLCV	719	Type 1	YES	0.00032	PF02922_CBM48	108	227	PF00128_Alpha_Amylase	226	635	PF02806_Alpha_Amylase_C	614	716
Vibrio fischeri	Q5DZB8	312309	GH13_9	Yellow	g-Proteobacteria	GLGB_VIBF1	715	Type 1	YES	5.6e-08	PF02922_CBM48	108	225	PF00128_Alpha_Amylase	216	577	PF02806_Alpha_Amylase_C	615	713
Chlamydia muridarum	Q9PL51	243161	GH13_9	Orange	Chlamydiae	GLGB_CHLMU	737	Type 1	YES	0.00033	PF02922_CBM48	109	219	PF00128_Alpha_Amylase	261	644	PF02806_Alpha_Amylase_C	618	691
Corynebacterium jeikeium	Q4JUK5	306537	GH13_9	Pink	Actinobacteria	GLGB_CORJK	711	Type 1	YES	2.6e-06	PF02922_CBM48	109	213	PF00128_Alpha_Amylase	239	598	PF02806_Alpha_Amylase_C	611	708
Methylobacillus flagellatus	Q1H1K2	265072	GH13_9	Yellow	b-Proteobacteria	GLGB_METFK	725	Type 1	NO	0.066	PF02922_CBM48	109	222	PF00128_Alpha_Amylase	247	601	PF02806_Alpha_Amylase_C	623	723
Chlamydia abortus	Q5L6K4	218497	GH13_9	Orange	Chlamydiae	GLGB_CHLAB	721	Type 1	YES	7.5e-05	PF02922_CBM48	110	222	PF00128_Alpha_Amylase	252	616	PF02806_Alpha_Amylase_C	617	718
Novosphingobium aromaticivorans	Q2G7S5	279238	GH13_9	Yellow	a-Proteobacteria	GLGB_NOVAD	721	Type 1	YES	0.007	PF02922_CBM48	110	238	PF00128_Alpha_Amylase	257	589	PF02806_Alpha_Amylase_C	625	718
Saccharophagus degradans	Q21M30	203122	GH13_9	Yellow	g-Proteobacteria	GLGB_SACD2	729	Type 1	YES	0.0013	PF02922_CBM48	110	223	PF00128_Alpha_Amylase	263	653	PF02806_Alpha_Amylase_C	626	726
Chlamydia trachomatis	O84874	272561	GH13_9	Orange	Chlamydiae	GLGB_CHLTR	738	Type 1	YES	0.0025	PF02922_CBM48	111	206	PF00128_Alpha_Amylase	249	647	PF02806_Alpha_Amylase_C	618	733
Protochlamydia amoebophila	Q6MAB4	264201	GH13_9	Orange	Chlamydiae	GLGB_PARUW	727	Type 1	YES	2.5e-09	PF02922_CBM48	111	238	PF00128_Alpha_Amylase	253	642	PF02806_Alpha_Amylase_C	628	725
Nitrobacter hamburgensis	Q1QNB1	323097	GH13_9	Yellow	a-Proteobacteria	GLGB_NITHX	716	Type 1	YES	6.1e-06	PF02922_CBM48	112	212	PF00128_Alpha_Amylase	247	586	PF02806_Alpha_Amylase_C	595	712
Nitrobacter winogradskyi	Q3STC2	323098	GH13_9	Yellow	a-Proteobacteria	GLGB_NITWN	716	Type 1	YES	1.2e-06	PF02922_CBM48	112	213	PF00128_Alpha_Amylase	255	587	PF02806_Alpha_Amylase_C	616	712
Bradyrhizobium sp.	A5EPZ7	288000	GH13_9	Yellow	a-Proteobacteria	GLGB_BRASB	712	Type 1	YES	1.9e-06	PF02922_CBM48	113	212	PF00128_Alpha_Amylase	249	585	PF02806_Alpha_Amylase_C	600	709
Gloeobacter violaceus	Q7NL20	251221	GH13_9	Light Green	Cyanobacteria	GLGB_GLOVI	733	Type 1	YES	1.7e-08	PF02922_CBM48	113	220	PF00128_Alpha_Amylase	263	605	PF02806_Alpha_Amylase_C	627	730
Prochlorococcus marinus	A2BQ65	146891	GH13_9	Light Green	Cyanobacteria	GLGB_PROMS	754	Type 1	YES	1.2e-07	PF02922_CBM48	113	219	PF00128_Alpha_Amylase	239	685	PF02806_Alpha_Amylase_C	648	752
Rhodopseudomonas palustris	Q6N3P9	258594	GH13_9	Yellow	a-Proteobacteria	GLGB_RHOPA	716	Type 1	YES	1.2e-10	PF02922_CBM48	113	214	PF00128_Alpha_Amylase	250	590	PF02806_Alpha_Amylase_C	616	713
Roseobacter denitrificans	Q165E2	375451	GH13_9	Yellow	a-Proteobacteria	GLGB_ROSDO	731	Type 1	YES	0.0001	PF02922_CBM48	113	237	PF00128_Alpha_Amylase	270	599	PF02806_Alpha_Amylase_C	606	729
Bifidobacterium longum	Q8G5L0	206672	GH13_9	Pink	Actinobacteria	GLGB_BIFLO	737	Type 1	YES	5.1e-08	PF02922_CBM48	114	250	PF00128_Alpha_Amylase	222	648	PF02806_Alpha_Amylase_C	635	736
Burkholderia ambifaria	Q0B3Y4	339670	-	Yellow	b-Proteobacteria	GLGB_BURCM	733	Type 1	YES	4.5e-06	PF02922_CBM48	114	233	PF00128_Alpha_Amylase	267	602	PF02806_Alpha_Amylase_C	631	731
Corynebacterium glutamicum	Q8NR40	196627	GH13_9	Pink	Actinobacteria	GLGB_CORGL	731	Type 1	YES	2.2e-06	PF02922_CBM48	114	236	PF00128_Alpha_Amylase	229	613	PF02806_Alpha_Amylase_C	628	728
Haemophilus somnus	Q0I3H7	205914	GH13_9	Yellow	g-Proteobacteria	GLGB_HAES1	807	Type 1	YES	1.8e-09	PF02922_CBM48	114	238	PF00128_Alpha_Amylase	259	791	PF02806_Alpha_Amylase_C	627	764
Histophilus somni	B0UU89	228400	GH13_9	Yellow	g-Proteobacteria	GLGB_HISS2	815	Type 1	YES	8.4e-10	PF02922_CBM48	114	238	PF00128_Alpha_Amylase	259	784	PF02806_Alpha_Amylase_C	627	764
Pseudoalteromonas atlantica	Q15VD0	342610	GH13_9	Yellow	g-Proteobacteria	GLGB_PSEA6	729	Type 1	YES	1.8e-05	PF02922_CBM48	114	235	PF00128_Alpha_Amylase	204	618	PF02806_Alpha_Amylase_C	624	724
Actinobacillus succinogenes	A6VP15	339671	GH13_9	Yellow	g-Proteobacteria	GLGB_ACTSZ	829	Type 1	YES	2.3e-06	PF02922_CBM48	115	236	PF00128_Alpha_Amylase	258	802	PF02806_Alpha_Amylase_C	604	764
Chlamydia pneumoniae	Q9Z876	83558	GH13_9	Orange	Chlamydiae	GLGB_CHLPN	720	Type 1	YES	0.00042	PF02922_CBM48	115	222	PF00128_Alpha_Amylase	259	646	PF02806_Alpha_Amylase_C	613	715
Rubrobacter xylanophilus	Q1AZ86	266117	GH13_9	Pink	Actinobacteria	GLGB_RUBXD	722	Type 1	YES	0.00016	PF02922_CBM48	115	205	PF00128_Alpha_Amylase	260	582	PF02806_Alpha_Amylase_C	617	718
Serratia proteamaculans	A8GKV0	399741	GH13_9	Yellow	g-Proteobacteria	GLGB_SERP5	728	Type 1	YES	5.5e-09	PF02922_CBM48	115	236	PF00128_Alpha_Amylase	255	668	PF02806_Alpha_Amylase_C	625	723
Xanthomonas axonopodis GlgB1	Q8PR13	190486	GH13_9	Yellow	g-Proteobacteria	GLGB1_XANAC	724	Type 1	YES	2.3e-09	PF02922_CBM48	115	234	PF00128_Alpha_Amylase	254	598	PF02806_Alpha_Amylase_C	621	721
Xanthomonas campestris GlgB1	Q4V0E2	314565	GH13_9	Yellow	g-Proteobacteria	GLGB1_XANC8	724	Type 1	YES	7.9e-11	PF02922_CBM48	115	235	PF00128_Alpha_Amylase	254	600	PF02806_Alpha_Amylase_C	620	721
Yersinia enterocolitica	A1JSJ0	393305	GH13_9	Yellow	g-Proteobacteria	GLGB_YERE8	727	Type 1	YES	2.4e-06	PF02922_CBM48	115	220	PF00128_Alpha_Amylase	258	628	PF02806_Alpha_Amylase_C	625	724
Bradyrhizobium diazoefficiens	Q89FD3	224911	GH13_9	Yellow	a-Proteobacteria	GLGB_BRADU	721	Type 1	YES	7.6e-05	PF02922_CBM48	116	221	PF00128_Alpha_Amylase	259	601	PF02806_Alpha_Amylase_C	619	718
Burkholderia vietnamiensis	A4JR39	269482	GH13_9	Yellow	b-Proteobacteria	GLGB_BURVG	733	Type 1	YES	0.0036	PF02922_CBM48	116	230	PF00128_Alpha_Amylase	271	601	PF02806_Alpha_Amylase_C	631	731
Corynebacterium efficiens	Q8FQ12	196164	GH13_9	Pink	Actinobacteria	GLGB_COREF	731	Type 1	YES	1.1e-05	PF02922_CBM48	116	235	PF00128_Alpha_Amylase	232	624	PF02806_Alpha_Amylase_C	628	727
Granulibacter bethesdensis	Q0BU54	391165	GH13_9	Yellow	a-Proteobacteria	GLGB_GRABC	734	Type 1	YES	6.3e-06	PF02922_CBM48	116	227	PF00128_Alpha_Amylase	235	620	PF02806_Alpha_Amylase_C	610	733
Pectobacterium atrosepticum	Q6CZK0	218491	GH13_9	Yellow	g-Proteobacteria	GLGB_PECAS	725	Type 1	YES	1.9e-06	PF02922_CBM48	116	216	PF00128_Alpha_Amylase	227	634	PF02806_Alpha_Amylase_C	623	722
Pseudomonas aeruginosa	Q9I1W2	208964	GH13_9	Yellow	g-Proteobacteria	GLGB_PSEAE	732	Type 1	YES	7.5e-09	PF02922_CBM48	116	231	PF00128_Alpha_Amylase	262	612	PF02806_Alpha_Amylase_C	627	729
Thermosynechococcus elongatus	Q8DLB8	197221	GH13_9	Light Green	Cyanobacteria	GLGB_THEEB	766	Type 1	YES	3e-10	PF02922_CBM48	116	227	PF00128_Alpha_Amylase	288	660	PF02806_Alpha_Amylase_C	646	757
Yersinia pestis	Q8ZA75	632	GH13_9	Yellow	g-Proteobacteria	GLGB_YERPE	727	Type 1	YES	2.4e-06	PF02922_CBM48	116	219	PF00128_Alpha_Amylase	258	647	PF02806_Alpha_Amylase_C	625	723
Mannheimia succiniciproducens	Q65TI0	221988	GH13_9	Yellow	g-Proteobacteria	GLGB_MANSM	729	Type 1	YES	9e-10	PF02922_CBM48	117	239	PF00128_Alpha_Amylase	261	625	PF02806_Alpha_Amylase_C	626	726
Pseudomonas putida	Q88FN1	160488	GH13_9	Yellow	g-Proteobacteria	GLGB_PSEPK	736	Type 1	YES	0.00039	PF02922_CBM48	117	243	PF00128_Alpha_Amylase	276	649	PF02806_Alpha_Amylase_C	634	734
Shewanella oneidensis	Q8EGU7	211586	GH13_9	Yellow	g-Proteobacteria	GLGB_SHEON	745	Type 1	YES	3.7e-05	PF02922_CBM48	117	244	PF00128_Alpha_Amylase	228	606	PF02806_Alpha_Amylase_C	632	733
Shewanella sp.	Q0HGI8	60480	GH13_9	Yellow	g-Proteobacteria	GLGB_SHESM	745	Type 1	YES	8.9e-05	PF02922_CBM48	117	246	PF00128_Alpha_Amylase	233	607	PF02806_Alpha_Amylase_C	631	734
Haemophilus influenzae	Q4QK67	281310	GH13_9	Yellow	g-Proteobacteria	GLGB_HAEI8	730	Type 1	YES	2.9e-05	PF02922_CBM48	118	240	PF00128_Alpha_Amylase	253	602	PF02806_Alpha_Amylase_C	627	728
Mycobacterium bovis	P59816	233413	-	Pink	Actinobacteria	GLGB_MYCBO	731	Type 1	YES	1.5e-05	PF02922_CBM48	118	234	PF00128_Alpha_Amylase	253	597	PF02806_Alpha_Amylase_C	630	729
Mycobacterium tuberculosis	A5U226	419947	GH13_9	Pink	Actinobacteria	GLGB_MYCTA	731	Type 1	YES	1.3e-05	PF02922_CBM48	118	234	PF00128_Alpha_Amylase	253	597	PF02806_Alpha_Amylase_C	630	729
Mycobacterium ulcerans	A0PUI6	362242	GH13_9	Pink	Actinobacteria	GLGB_MYCUA	731	Type 1	YES	1.6e-06	PF02922_CBM48	118	236	PF00128_Alpha_Amylase	259	594	PF02806_Alpha_Amylase_C	630	729
Shewanella baltica	A3D286	325240	GH13_9	Yellow	g-Proteobacteria	GLGB_SHEB5	743	Type 1	YES	0.0058	PF02922_CBM48	118	233	PF00128_Alpha_Amylase	268	621	PF02806_Alpha_Amylase_C	632	733
Myxococcus xanthus	Q1D654	246197	GH13_9	Yellow	d-Proteobacteria	GLGB_MYXXD	734	Type 1	YES	6.4e-10	PF02922_CBM48	119	244	PF00128_Alpha_Amylase	267	608	PF02806_Alpha_Amylase_C	614	732
Nitrosomonas europaea	Q81ZU6	228410	GH13_9	Yellow	b-Proteobacteria	GLGB_NITEU	734	Type 1	YES	9.3e-06	PF02922_CBM48	119	227	PF00128_Alpha_Amylase	253	615	PF02806_Alpha_Amylase_C	631	730
Nostoc sp.	Q8YYX9	103690	GH13_9	Light Green	Cyanobacteria	GLGB_NOSS1	764	Type 1	YES	1.3e-09	PF02922_CBM48	119	231	PF00128_Alpha_Amylase	293	649	PF02806_Alpha_Amylase_C	650	759
Pseudomonas savastanoi	Q48IE2	264730	GH13_9	Yellow	g-Proteobacteria	GLGB_PSE14	741	Type 1	YES	6.5e-05	PF02922_CBM48	119	230	PF00128_Alpha_Amylase	269	651	PF02806_Alpha_Amylase_C	636	739
Pseudomonas syringae	Q4ZTJ2	205918	GH13_9	Yellow	g-Proteobacteria	GLGB_PSEU2	741	Type 1	YES	0.00011	PF02922_CBM48	119	229	PF00128_Alpha_Amylase	272	662	PF02806_Alpha_Amylase_C	637	739
Shewanella putrefaciens	A4Y4U3	319224	GH13_9	Yellow	g-Proteobacteria	GLGB_SHEPC	745	Type 1	YES	0.00053	PF02922_CBM48	119	240	PF00128_Alpha_Amylase	256	613	PF02806_Alpha_Amylase_C	634	739
Actinobacillus pleuropneumoniae	B0BT96	434271	GH13_9	Yellow	g-Proteobacteria	GLGB_ACTPJ	777	Type 1	YES	0.00028	PF02922_CBM48	120	225	PF00128_Alpha_Amylase	261	682	PF02806_Alpha_Amylase_C	630	764
Citrobacter koseri	A8AQY3	290338	GH13_9	Yellow	g-Proteobacteria	GLGB_CITK8	728	Type 1	YES	1.2e-05	PF02922_CBM48	120	233	PF00128_Alpha_Amylase	258	624	PF02806_Alpha_Amylase_C	623	724
Enterobacter sp.	A4WFL5	399742	GH13_9	Yellow	g-Proteobacteria	GLGB_ENT38	728	Type 1	YES	6e-08	PF02922_CBM48	120	222	PF00128_Alpha_Amylase	243	636	PF02806_Alpha_Amylase_C	602	724
Escherichia coli	P07762	83333	GH13_9	Yellow	g-Proteobacteria	GLGB_ECOLI	728	Type 1	YES	1.6e-05	PF02922_CBM48	120	236	PF00128_Alpha_Amylase	256	628	PF02806_Alpha_Amylase_C	604	724
Rhodobacter sphaeroides	Q3J3M6	272943	GH13_9	Yellow	a-Proteobacteria	GLGB_RHOS4	728	Type 1	YES	2.4e-07	PF02922_CBM48	120	231	PF00128_Alpha_Amylase	262	596	PF02806_Alpha_Amylase_C	605	724
Rhodopirellula baltica	Q7UVH1	243090	GH13_9	Dark Grey	Planctomycetes	GLGB_RHOBA	736	Type 1	YES	7.4e-05	PF02922_CBM48	120	221	PF00128_Alpha_Amylase	269	613	PF02806_Alpha_Amylase_C	633	733
Salmonella arizonae	A9MMA0	41514	GH13_9	Yellow	g-Proteobacteria	GLGB_SALAR	728	Type 1	YES	0.00026	PF02922_CBM48	120	238	PF00128_Alpha_Amylase	258	628	PF02806_Alpha_Amylase_C	623	724
Salmonella choleraesuis	Q57IT8	321314	GH13_9	Yellow	g-Proteobacteria	GLGB_SALCH	728	Type 1	YES	0.00013	PF02922_CBM48	120	236	PF00128_Alpha_Amylase	259	631	PF02806_Alpha_Amylase_C	623	724
Salmonella paratyphi	Q5PM06	295319	GH13_9	Yellow	g-Proteobacteria	GLGB_SALPA	728	Type 1	YES	0.00013	PF02922_CBM48	120	236	PF00128_Alpha_Amylase	259	631	PF02806_Alpha_Amylase_C	623	724
Salmonella typhi	Q8Z235	90370	-	Yellow	g-Proteobacteria	GLGB_SALTI	728	Type 1	YES	0.00013	PF02922_CBM48	120	236	PF00128_Alpha_Amylase	259	631	PF02806_Alpha_Amylase_C	623	724
Salmonella typhimurium	Q8ZLG5	99287	GH13_9	Yellow	g-Proteobacteria	GLGB_SALTY	728	Type 1	YES	0.00015	PF02922_CBM48	120	219	PF00128_Alpha_Amylase	260	631	PF02806_Alpha_Amylase_C	623	724
Shigella boydii	Q31VJ1	300268	GH13_9	Yellow	g-Proteobacteria	GLGB_SHIBS	728	Type 1	YES	1.6e-05	PF02922_CBM48	120	237	PF00128_Alpha_Amylase	258	628	PF02806_Alpha_Amylase_C	604	724
Shigella dysenteriae	Q32AV3	300267	GH13_9	Yellow	g-Proteobacteria	GLGB_SHIDS	728	Type 1	YES	1.6e-05	PF02922_CBM48	120	236	PF00128_Alpha_Amylase	256	628	PF02806_Alpha_Amylase_C	604	724
Shigella flexneri	Q83PV3	623	-	Yellow	g-Proteobacteria	GLGB_SHIFL	728	Type 1	YES	1.6e-05	PF02922_CBM48	120	236	PF00128_Alpha_Amylase	256	627	PF02806_Alpha_Amylase_C	604	724
Shigella sonnei	Q3YW93	300269	GH13_9	Yellow	g-Proteobacteria	GLGB_SHISS	728	Type 1	YES	1.6e-05	PF02922_CBM48	120	236	PF00128_Alpha_Amylase	256	628	PF02806_Alpha_Amylase_C	604	724
Thiomicrospira crunogena	Q31IB6	317025	GH13_9	Yellow	g-Proteobacteria	GLGB_THICR	726	Type 1	YES	7.2e-07	PF02922_CBM48	120	224	PF00128_Alpha_Amylase	212	589	PF02806_Alpha_Amylase_C	623	724
Xanthomonas campestris GlgB2	Q4UZL7	314565	GH13_9	Yellow	g-Proteobacteria	GLGB2_XANC8	729	Type 1	YES	2e-10	PF02922_CBM48	120	222	PF00128_Alpha_Amylase	257	607	PF02806_Alpha_Amylase_C	602	728
Agrobacterium fabrum	Q8U8L4	176299	GH13_9	Yellow	a-Proteobacteria	GLGB_AGRFC	735	Type 1	YES	1.7e-07	PF02922_CBM48	121	254	PF00128_Alpha_Amylase	237	608	PF02806_Alpha_Amylase_C	613	734
Burkholderia pseudomallei	A3NU16	357348	GH13_9	Yellow	b-Proteobacteria	GLGB_BURP0	738	Type 1	YES	9.1e-05	PF02922_CBM48	121	237	PF00128_Alpha_Amylase	267	604	PF02806_Alpha_Amylase_C	636	736
Dickeya chrysanthemi	Q8GQC5	556	GH13_9	Yellow	g-Proteobacteria	GLGB_DICCH	731	Type 1	YES	0.00035	PF02922_CBM48	121	226	PF00128_Alpha_Amylase	241	603	PF02806_Alpha_Amylase_C	628	728
Klebsiella pneumoniae	A6TF51	272620	GH13_9	Yellow	g-Proteobacteria	GLGB_KLEP7	728	Type 1	YES	1.3e-06	PF02922_CBM48	121	220	PF00128_Alpha_Amylase	260	634	PF02806_Alpha_Amylase_C	624	724
Nitrosospira multiformis	Q2YB47	323848	GH13_9	Yellow	b-Proteobacteria	GLGB_NITMU	746	Type 1	YES	1.8e-05	PF02922_CBM48	121	235	PF00128_Alpha_Amylase	266	629	PF02806_Alpha_Amylase_C	632	737
Pasteurella multocida	Q9CN94	272843	GH13_9	Yellow	g-Proteobacteria	GLGB_PASMU	730	Type 1	YES	4.1e-06	PF02922_CBM48	121	232	PF00128_Alpha_Amylase	253	685	PF02806_Alpha_Amylase_C	627	728
Pseudomonas fluorescens	Q4KCQ3	220664	GH13_9	Yellow	g-Proteobacteria	GLGB_PSEF5	743	Type 1	YES	0.02	PF02922_CBM48	121	230	PF00128_Alpha_Amylase	280	632	PF02806_Alpha_Amylase_C	641	740
Rhizobium leguminosarum GlgB2	Q1M3A7	216596	GH13_9	Yellow	a-Proteobacteria	GLGB2_RHIL3	736	Type 1	YES	2.9e-07	PF02922_CBM48	121	226	PF00128_Alpha_Amylase	238	611	PF02806_Alpha_Amylase_C	633	732
Rhizobium loti	Q985P4	266835	GH13_9	Yellow	a-Proteobacteria	GLGB_RHILO	737	Type 1	YES	1.2e-05	PF02922_CBM48	121	249	PF00128_Alpha_Amylase	264	610	PF02806_Alpha_Amylase_C	636	735
Rhodococcus jostii	Q0SGR9	101510	GH13_9	Pink	Actinobacteria	GLGB_RHOJR	732	Type 1	YES	5.6e-09	PF02922_CBM48	121	245	PF00128_Alpha_Amylase	234	627	PF02806_Alpha_Amylase_C	630	729
Xanthomonas oryzae GlgB2	Q2P949	342109	GH13_9	Yellow	g-Proteobacteria	GLGB2_XANOM	731	Type 1	YES	3.4e-11	PF02922_CBM48	121	240	PF00128_Alpha_Amylase	260	599	PF02806_Alpha_Amylase_C	628	728
Anabaena variabilis	Q3M473	240292	GH13_9	Light Green	Cyanobacteria	GLGB_ANAVT	764	Type 1	YES	3.6e-09	PF02922_CBM48	122	232	PF00128_Alpha_Amylase	292	647	PF02806_Alpha_Amylase_C	650	760
Burkholderia cenocepacia	Q1BVW7	331271	GH13_9	Yellow	b-Proteobacteria	GLGB_BURCA	736	Type 1	YES	0.0015	PF02922_CBM48	122	235	PF00128_Alpha_Amylase	262	607	PF02806_Alpha_Amylase_C	634	734
Vibrio cholerae	Q9KNE8	243277	GH13_9	Yellow	g-Proteobacteria	GLGB_VIBCH	729	Type 1	YES	5.8e-06	PF02922_CBM48	122	245	PF00128_Alpha_Amylase	261	595	PF02806_Alpha_Amylase_C	628	727
Burkholderia lata	Q39N89	482957	GH13_9	Yellow	b-Proteobacteria	GLGB_BURL3	735	Type 1	YES	0.012	PF02922_CBM48	123	245	PF00128_Alpha_Amylase	272	604	PF02806_Alpha_Amylase_C	634	733
Magnetospirillum magneticum	Q2W2Q6	342108	GH13_9	Yellow	a-Proteobacteria	GLGB_MAGSA	740	Type 1	YES	3.2e-07	PF02922_CBM48	123	252	PF00128_Alpha_Amylase	284	600	PF02806_Alpha_Amylase_C	634	739
Methylococcus capsulatus	Q608L5	243233	GH13_9	Yellow	g-Proteobacteria	GLGB_METCA	740	Type 1	YES	0.0034	PF02922_CBM48	123	219	PF00128_Alpha_Amylase	266	614	PF02806_Alpha_Amylase_C	624	727
Mycobacterium smegmatis	A0R1Y4	246196	GH13_9	Pink	Actinobacteria	GLGB_MYCS2	736	Type 1	YES	5.7e-07	PF02922_CBM48	123	245	PF00128_Alpha_Amylase	260	605	PF02806_Alpha_Amylase_C	614	734
Rhizobium etli GlgB2	Q2JZ21	347834	GH13_9	Yellow	a-Proteobacteria	GLGB2_RHIEC	732	Type 1	YES	2.1e-06	PF02922_CBM48	123	231	PF00128_Alpha_Amylase	265	630	PF02806_Alpha_Amylase_C	629	730
Rhizobium leguminosarum GlgB1	Q1MBS9	216596	GH13_9	Yellow	a-Proteobacteria	GLGB1_RHIL3	735	Type 1	YES	0.00078	PF02922_CBM48	123	252	PF00128_Alpha_Amylase	246	616	PF02806_Alpha_Amylase_C	615	734
Trichodesmium erythraeum	Q114I1	203124	GH13_9	Light Green	Cyanobacteria	GLGB_TRIEI	776	Type 1	YES	8e-07	PF02922_CBM48	123	232	PF00128_Alpha_Amylase	233	640	PF02806_Alpha_Amylase_C	648	765
Chelativorans sp.	Q11EX1	266779	GH13_9	Yellow	a-Proteobacteria	GLGB_CHESB	738	Type 1	YES	0.0025	PF02922_CBM48	124	230	PF00128_Alpha_Amylase	268	610	PF02806_Alpha_Amylase_C	634	735
Mycobacterium paratuberculosis	Q73X75	262316	GH13_9	Pink	Actinobacteria	GLGB_MYCPA	731	Type 1	YES	1.4e-07	PF02922_CBM48	124	239	PF00128_Alpha_Amylase	255	597	PF02806_Alpha_Amylase_C	630	729
Paraburkholderia xenovorans	Q13S07	266265	GH13_9	Yellow	b-Proteobacteria	GLGB_PARXL	736	Type 1	YES	0.0006	PF02922_CBM48	124	241	PF00128_Alpha_Amylase	270	605	PF02806_Alpha_Amylase_C	636	734
Rhizobium etli GlgB1	Q2K487	347834	GH13_9	Yellow	a-Proteobacteria	GLGB1_RHIEC	735	Type 1	YES	0.0015	PF02922_CBM48	124	250	PF00128_Alpha_Amylase	240	613	PF02806_Alpha_Amylase_C	615	734
Rhizobium meliloti	Q92M14	266834	GH13_9	Yellow	a-Proteobacteria	GLGB_RHIME	736	Type 1	YES	4.3e-05	PF02922_CBM48	124	252	PF00128_Alpha_Amylase	239	611	PF02806_Alpha_Amylase_C	635	734
Synechococcus elongatus	P16954	1140	GH13_9	Light Green	Cyanobacteria	GLGB_SYNE7	774	Type 1	YES	2.5e-07	PF02922_CBM48	124	230	PF00128_Alpha_Amylase	299	667	PF02806_Alpha_Amylase_C	652	762
Synechococcus sp.	Q5N4W5	269084	GH13_9	Light Green	Cyanobacteria	GLGB_SYNP6	774	Type 1	YES	2.5e-07	PF02922_CBM48	124	230	PF00128_Alpha_Amylase	299	667	PF02806_Alpha_Amylase_C	652	762
Corynebacterium diphtheriae	Q6NHR6	257309	GH13_9	Pink	Actinobacteria	GLGB_CORDI	732	Type 1	YES	0.00025	PF02922_CBM48	125	244	PF00128_Alpha_Amylase	213	608	PF02806_Alpha_Amylase_C	609	729
Synechocystis sp.	P52981	1111708	GH13_9	Light Green	Cyanobacteria	GLGB_SYNY3	770	Type 1	YES	4.2e-10	PF02922_CBM48	126	222	PF00128_Alpha_Amylase	284	662	PF02806_Alpha_Amylase_C	649	763
Bordetella bronchiseptica	Q7WII7	257310	GH13_9	Yellow	b-Proteobacteria	GLGB_BORBR	731	Type 1	YES	1.8e-09	PF02922_CBM48	128	231	PF00128_Alpha_Amylase	262	591	PF02806_Alpha_Amylase_C	629	728
Bordetella parapertussis	Q7W6L4	257311	GH13_9	Yellow	b-Proteobacteria	GLGB_BORPA	731	Type 1	YES	1.8e-09	PF02922_CBM48	128	231	PF00128_Alpha_Amylase	262	592	PF02806_Alpha_Amylase_C	629	728
Bordetella pertussis	Q7VYK0	257313	GH13_9	Yellow	b-Proteobacteria	GLGB_BORPE	731	Type 1	YES	1.8e-09	PF02922_CBM48	128	231	PF00128_Alpha_Amylase	262	592	PF02806_Alpha_Amylase_C	629	728
Rhodospirillum rubrum	Q2RR72	269796	GH13_9	Yellow	a-Proteobacteria	GLGB_RHORT	740	Type 1	YES	1.2e-05	PF02922_CBM48	128	226	PF00128_Alpha_Amylase	242	595	PF02806_Alpha_Amylase_C	629	731
Bergeriella denitrificans	Q9RQI5	494	GH13_9	Yellow	b-Proteobacteria	GLGB_BERDE	762	Type 1	YES	0.036	PF02922_CBM48	130	230	PF00128_Alpha_Amylase	267	659	PF02806_Alpha_Amylase_C	632	759
Cellvibrio japonicus	B3PGN4	498211	GH13_9	Yellow	g-Proteobacteria	GLGB_CELJU	737	Type 1	YES	2.3e-07	PF02922_CBM48	130	229	PF00128_Alpha_Amylase	230	637	PF02806_Alpha_Amylase_C	637	735
Cupriavidus necator	Q0K0X8	381666	GH13_9	Yellow	b-Proteobacteria	GLGB_CUPNH	756	Type 1	YES	2e-09	PF02922_CBM48	130	231	PF00128_Alpha_Amylase	264	618	PF02806_Alpha_Amylase_C	642	744
Shewanella frigidimarina	Q081Q4	318167	GH13_9	Yellow	g-Proteobacteria	GLGB_SHEFN	744	Type 1	YES	0.0044	PF02922_CBM48	131	240	PF00128_Alpha_Amylase	236	626	PF02806_Alpha_Amylase_C	626	735
Xanthomonas oryzae GlgB1	Q2P9F7	342109	GH13_9	Yellow	g-Proteobacteria	GLGB1_XANOM	744	Type 1	YES	2.3e-07	PF02922_CBM48	131	234	PF00128_Alpha_Amylase	272	613	PF02806_Alpha_Amylase_C	620	743
Leifsonia xyli	Q6AEU4	281090	GH13_9	Pink	Actinobacteria	GLGB_LEIXX	733	Type 1	NO	n/a	PF02922_CBM48	132	241	PF00128_Alpha_Amylase	236	605	PF02806_Alpha_Amylase_C	631	730
Mycobacterium sp.	A3Q396	164757	GH13_9	Pink	Actinobacteria	GLGB_MYCSJ	759	Type 1	YES	1.4e-07	PF02922_CBM48	132	259	PF00128_Alpha_Amylase	247	614	PF02806_Alpha_Amylase_C	641	745
Thiobacillus denitrificans	Q3SH78	292415	GH13_9	Yellow	b-Proteobacteria	GLGB_THIDA	740	Type 1	YES	0.00013	PF02922_CBM48	132	257	PF00128_Alpha_Amylase	243	630	PF02806_Alpha_Amylase_C	637	737
Nocardia farcinica	Q5Z0W8	247156	GH13_9	Pink	Actinobacteria	GLGB_NOCFA	744	Type 1	YES	7e-10	PF02922_CBM48	137	245	PF00128_Alpha_Amylase	252	612	PF02806_Alpha_Amylase_C	641	740
Nitrosococcus oceani	Q3JCN0	323261	GH13_9	Yellow	g-Proteobacteria	GLGB_NITOC	749	Type 1	YES	0.0014	PF02922_CBM48	138	237	PF00128_Alpha_Amylase	224	618	PF02806_Alpha_Amylase_C	631	737
Streptomyces coelicolor GlgB2	Q59832	100226	GH13_9	Pink	Actinobacteria	GLGB2_STRCO	741	Type 1	YES	1.4e-11	PF02922_CBM48	138	257	PF00128_Alpha_Amylase	263	636	PF02806_Alpha_Amylase_C	643	736
Thermobifida fusca	Q47SE7	269800	GH13_9	Pink	Actinobacteria	GLGB_THEFY	749	Type 1	YES	6e-09	PF02922_CBM48	142	265	PF00128_Alpha_Amylase	255	623	PF02806_Alpha_Amylase_C	644	745
Rhizobium radiobacter	P52979	358	GH13_9	Yellow	a-Proteobacteria	GLGB_RHIRD	734	Type 1	YES	5.7e-05	PF02922_CBM48	145	253	PF00128_Alpha_Amylase	237	607	PF02806_Alpha_Amylase_C	612	733
Vibrio parahaemolyticus	Q87FR0	223926	GH13_9	Yellow	g-Proteobacteria	GLGB_VIBPA	755	Type 1	YES	1.3e-06	PF02922_CBM48	146	268	PF00128_Alpha_Amylase	253	493	PF02806_Alpha_Amylase_C	630	752
Streptomyces aureofaciens	P52980	1894	GH13_9	Pink	Actinobacteria	GLGB_STRAU	764	Type 1	YES	1.8e-08	PF02922_CBM48	158	276	PF00128_Alpha_Amylase	292	633	PF02806_Alpha_Amylase_C	663	763
Ralstonia solanacearum	Q8XT76	267608	GH13_9	Yellow	b-Proteobacteria	GLGB_RALSO	775	Type 1	YES	0.00015	PF02922_CBM48	161	263	PF00128_Alpha_Amylase	313	642	PF02806_Alpha_Amylase_C	671	774
Streptomyces coelicolor GlgB1	Q59833	100226	GH13_9	Pink	Actinobacteria	GLGB1_STRCO	774	Type 1	YES	8.8e-08	PF02922_CBM48	174	277	PF00128_Alpha_Amylase	296	659	PF02806_Alpha_Amylase_C	684	764
Frankia casuarinae*	Q2J6Q9	106370	GH13_9	Pink	Actinobacteria	GLGB_FRACC	812	Type 3	YES	2e-09	PF02922_CBM48	201	317	PF00128_Alpha_Amylase	329	671	PF02806_Alpha_Amylase_C	707	810
Burkholderia thailandensis*	Q2T6R3	271848	GH13_9	Yellow	b-Proteobacteria	GLGB_BURTA	834	Type 3	YES	6e-06	PF02922_CBM48	220	322	PF00128_Alpha_Amylase	368	696	PF02806_Alpha_Amylase_C	728	830
Streptomyces avermitilis GlgB1*	Q82JF0	227882	GH13_9	Pink	Actinobacteria	GLGB1_STRAW	838	Type 3	YES	4.3e-09	PF02922_CBM48	230	359	PF00128_Alpha_Amylase	343	713	PF02806_Alpha_Amylase_C	735	836
